# Benefits of siderophore release lie in mediating diffusion limitation at low iron solubility

Gabriel E. Leventhal<sup>1,2</sup>, Martin Ackermann<sup>3,4</sup>, and Konstanze T. Schiessl<sup>3,4,5</sup>

<sup>1</sup>Institute of Integrative Biology, Swiss Federal Institute of Technology Zurich (ETH Zürich), Zurich, Switzerland

<sup>2</sup>Department of Civil and Environmental Engineering, Massachusetts Institute of Technology (MIT), Cambridge, MA, U.S.A.

<sup>3</sup>Institute of Biogeochemistry and Pollutant Dynamics, Swiss Federal Institute of Technology Zurich (ETH Zürich), Zurich, Switzerland

<sup>4</sup>Department of Environmental Microbiology, Swiss Federal Institute of Aquatic Science and Technology (Eawag), Dübendorf, Switzerland

<sup>5</sup>Department of Biological Sciences, Columbia University, 1212 Amsterdam Avenue, New York, NY 10027, USA

## 1 Abstract

2 Siderophores are chelators released by many bacteria to take up iron. In contrast to  
3 iron receptors located at the cell surface, released siderophores are at risk of being  
4 lost to environmental sinks. Here, we asked the question whether the release itself  
5 is essential for the function of siderophores, which could explain why such a risky  
6 strategy is widespread. We developed a reaction-diffusion model to determine the  
7 impact of siderophore release on overcoming iron limitation caused by poor solubility  
8 in aerobic, pH-neutral environments. We found that secretion of siderophores can  
9 efficiently accelerate iron uptake at low solubility, since secreted siderophores solubi-  
10 lize slowly diffusing large iron aggregates to small, quickly diffusing iron-siderophore  
11 complexes. At high iron solubility, however, when the iron-siderophore complex is no  
12 longer considerably smaller than the iron source itself, siderophore secretion can also  
13 slow down iron uptake. In addition, we found that cells can synergistically share their  
14 siderophores, depending on their distance and the level of iron aggregation. Overall,  
15 our study helps understand why siderophore secretion is so widespread: Even though  
16 a large fraction of secreted siderophores is lost, the solubilization of iron through se-  
17 creted siderophores can efficiently increase iron uptake, especially if siderophores are  
18 produced cooperatively by several cells.

## 19 Introduction

20 Iron is important for bacterial cell growth and reproduction, but iron availability is  
21 limited in many environments. One common cause of iron limitation is low concen-  
22 trations, such as in the oceans (Boyd & Ellwood, 2010). But iron availability even at  
23 higher concentrations can also be poor, due to the physicochemical properties of iron.  
24 More specifically, low iron solubility has been described as a widespread cause for iron  
25 limitation in aerobic, pH-neutral environments (Braun & Killmann, 1999; Kraemer,  
26 2004).

27 One of the various strategies bacteria employ to acquire iron is siderophore secre-  
28 tion, a widespread and well-studied mechanism (Hider & Kong, 2010). Siderophores  
29 are chelators that bacteria release into the environment to bind iron. The resulting  
30 iron-siderophore complexes are then again taken up by the bacteria.

31 An important consequence of secretion is that a cell might not recapture and thus  
32 benefit from siderophores it produced, due to random diffusion of the siderophore  
33 molecules. In dilute, well-mixed environments, the probability of recapturing a sider-  
34 ophore once it is secreted is low, and a solitary bacterium thus has to produce a large  
35 number of siderophores in order to achieve sufficient uptake of iron (Völker & Wolf-  
36 Gladrow, 1999). Also, released siderophores can be taken up by strains that do not  
37 contribute to siderophore production if these express the cognate receptor (De Vos  
38 *et al.*, 2001; West & Buckling, 2003). This can lead to a public goods dilemma, where  
39 nonproducing genotypes can displace bacteria that produce siderophores (Velicer,  
40 2003).

41 Bacteria can also acquire iron with alternative mechanisms that avoid the disad-  
42 vantages of secretion. For example, *Pseudomonas mendocina* can acquire iron upon  
43 direct physical contact with an iron-containing mineral by surface-associated reduc-  
44 tases (Kuhn *et al.*, 2013). Many bacteria also use outer membrane receptors for the  
45 uptake of iron bound to exogenous chelators like heme or transferrin (Andrews *et al.*,  
46 2003). Similarly, ferric citrate can be taken up via transporters or porins (Marshall  
47 *et al.*, 2009). It has also been suggested that siderophores can stay attached to the  
48 cell, e.g. in some marine bacteria (Martinez *et al.*, 2003) or at conditions of low cell  
49 density (Scholz & Greenberg, 2015).

50 Despite the existence of such alternative mechanisms that avoid the risk of sider-  
51 ophore loss, siderophore secretion is widespread in bacteria (Sandy & Butler, 2009),  
52 and has been described as key for iron uptake in environments with low iron avail-

53 ability (Miethke & Marahiel, 2007). This suggests that the *release* of siderophores  
54 might be directly beneficial for their function. However, it is less clear what possible  
55 benefits might be. In order to identify and quantify these benefits, we developed a  
56 mathematical model that enables us to compare the efficiency of iron uptake with and  
57 without the release of siderophores. We hypothesize that secretion of siderophores is  
58 especially important at low iron solubility, where diffusing siderophores can help over-  
59 come diffusion limitation caused by large, slowly moving iron aggregates that form  
60 due to poor solubility. Siderophores can solubilize these iron aggregates, generating  
61 quickly diffusing iron-siderophore chelates, potentially significantly speeding up iron  
62 uptake.

## 63 Results

### 64 *Development of a model to describe varying iron solubility*

65 As a first step to constructing a model for siderophore-iron interaction, we develop  
66 a description of the iron distribution at varying solubility. In aerobic, pH neutral  
67 environments, the predominant iron species, ferric iron, is poorly soluble. Low iron  
68 solubility results in the formation of iron aggregates (Kraemer, 2004), and one of the  
69 primary reported functions of siderophores is the solubilization of such iron aggre-  
70 gates (Vraspir & Butler, 2009). Iron aggregates are polymorphous, containing iron as  
71 well as hydroxide or other groups. Over time, and depending on external conditions  
72 like pH, the aggregates change in crystal structure and size (Cornell *et al.*, 1989;  
73 Schwertmann *et al.*, 1999). Here, we simplify this complexity by assuming that iron  
74 aggregates are spherical, and we account for varying solubility of iron by adjusting  
75 the number of iron ions,  $k$ , that comprise an aggregate. Soluble iron corresponds to  
76 the smallest iron aggregate, i.e. one iron ion surrounded by water molecules ( $k = 1$ ).  
77 The number of iron ions  $k$  contained in the aggregate, and thus the overall aggregate  
78 size, increases with decreasing solubility. We consider iron aggregates from  $k = 1$  up  
79 to  $k = 10^{12}$  iron ions, with corresponding radii  $r_k$  ranging from 0.1 nm to approx-  
80 imately the size of a cell,  $1 \mu\text{m}$ , covering the range of iron aggregate sizes present  
81 in marine environments; in open ocean waters, iron particles radii range from less  
82 than 10 nm to 350 nm (von der Heyden *et al.*, 2012; Wu *et al.*, 2001). For reasons of  
83 mathematical tractability, we assume a homogeneous distribution of iron aggregates,  
84 i.e. all aggregates have the same  $k$ . By varying  $k$ , we can then isolate the effect of

85 aggregate size on iron uptake.

## 86 ***Low iron solubility strongly decreases the rate of direct iron*** 87 ***uptake***

88 To establish a baseline reference for the iron uptake rate, we first consider a single  
89 cell that relies on secretion-independent uptake by direct physical contact with iron,  
90 mediated, for example, by cell-attached siderophores or receptors (Fig. 1, top). The  
91 cell can only take up iron it encounters directly; in the absence of any “active” motion,  
92 this can only be mediated by random diffusion. The uptake of iron can thus be  
93 described as a set of diffusing particles in three dimensions with the cell at the origin  
94 acting as an absorbing sphere (see Methods).

95 The likelihood of encounter between a cell and iron depends on the effective diffu-  
96 sion coefficient, which is the sum of the diffusion coefficient of the cell,  $D_B$ , and of the  
97 iron,  $D_k$ . The more iron ions are contained in an aggregate (larger  $k$ ), the larger the  
98 aggregate and the smaller the diffusion coefficient,  $D_k \sim k^{-1/3}$ . As a consequence, the  
99 likelihood of encounter with the cell is smaller for larger aggregates (see Methods).  
100 Since generally  $D_k \gg D_B$ , the uptake rate of  $k$ -aggregates for a single non-secreting  
101 cell with radius  $R_B$  is approximately

$$\phi_k \approx 4\pi\rho_0 R_B D_k. \quad (1)$$

102 Hence, the uptake rate decreases as  $k^{-1/3}$  with increasing aggregate size  $k$ . The  
103 uptake rate also increases linearly with the background iron concentration,  $\rho_0$ . We  
104 implemented a maximal uptake rate assuming an upper limit for the transport rate  
105 of iron across the cell membrane due to physiological or physical constraints (e.g. due  
106 to a maximum number of transporters; see Methods).

107 We distinguish between two environmental regimes, akin to diffusion-controlled  
108 reactions (Calef & Deutch, 1983): (1) In a transport-limited (reaction-limited) envi-  
109 ronment, iron uptake is limited by the amount of iron that can be processed by the  
110 transporters at the cell surface; (2) In a diffusion-limited environment, iron uptake is  
111 limited by the transport of iron to the cell surface by diffusion. Since iron aggregation  
112 influences the concentration of iron at the cell surface, the level of iron aggregation  
113 influences whether the environment is transport- or diffusion-limited at a given iron  
114 concentration (Fig. 2a).

115 At an iron concentration that is realistic for open ocean waters,  $\rho_0 = 0.1$  nM, diffu-

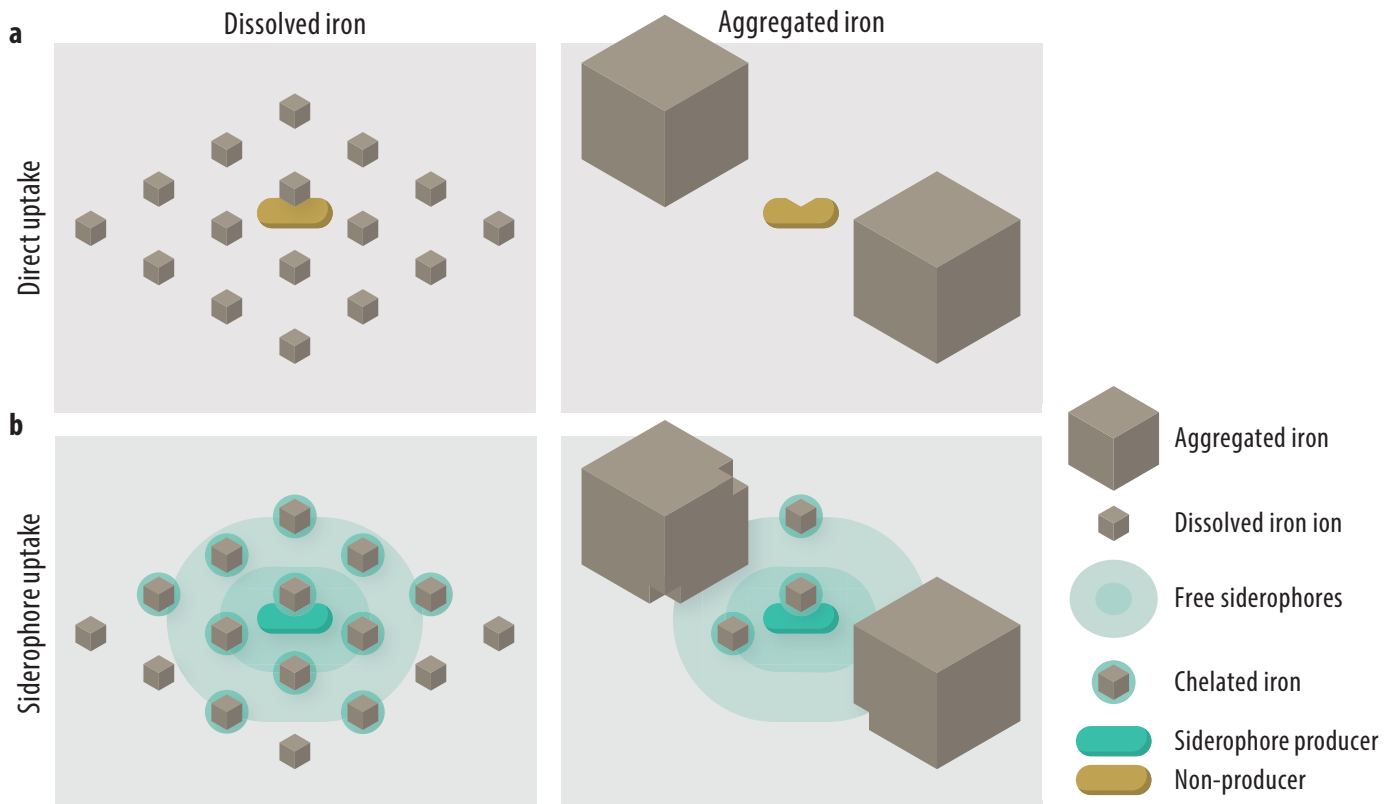

**Figure 1: Modeling the direct and siderophore-mediated uptake of dissolved and aggregated iron.** This figure illustrates two extreme cases of very strong iron aggregation or complete solubility. **a.** A cell not secreting siderophores must directly encounter iron particles for uptake. Due to its size, aggregated iron diffuses more slowly than dissolved iron. Therefore, at low solubility, which promotes iron aggregation, the cell's iron uptake rate slows down. **b.** A siderophore-secreting cell takes up siderophore-bound iron only. Each siderophore must first chelate an iron ion before the resulting chelate can be taken up by the cell. Since chelates are larger than dissolved iron, they diffuse slower, making siderophore-mediated iron uptake slower than direct uptake. When iron is aggregated, though, the diffusion coefficient of chelates is considerably higher than that of the aggregates. Hence, use of secreted siderophores accelerates uptake at low iron solubility.

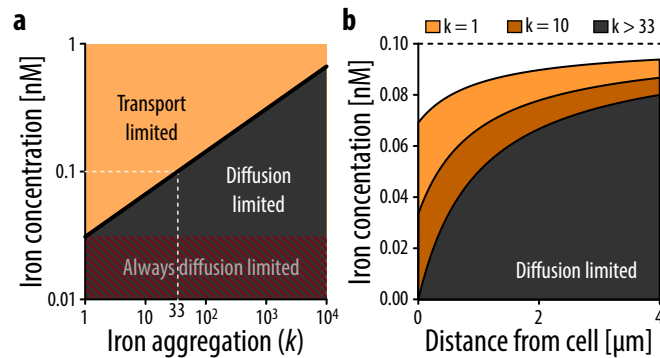

**Figure 2: Effect of iron solubility on direct iron uptake by a single cell.** **a.** Iron aggregation influences what process iron uptake is limited by. At a high iron concentration and/or if iron is highly dissolved, uptake of iron is limited by the speed of transport of iron into the cell (transport limited, orange area). As the aggregation level of iron increases at a given concentration, diffusion of iron slows down and eventually the iron at the cell surface is completely depleted. In this regime all iron that arrives at the cell surface is immediately taken up, and the cell is limited by the amount of iron diffusing to the cell (diffusion limited, black area). At very low iron concentrations, iron uptake is always limited by diffusion, irrespective of the degree of iron aggregation (red area). The dotted line highlights the background concentration used for calculations leading to the data in Figure 2b (0.1 nM). At this concentration, the threshold between the two types of limitation is at an aggregation level of  $k = 33$ . **b.** The equilibrium iron concentrations as a function of the distance from the cell, with a background concentration of iron  $\rho_0 = 0.1$  nM. At low  $k$ , in the transport-limited regime ( $k < 33$ , orange areas), the iron concentration at the cell surface decreases with increasing aggregation level of iron  $k$ , due to increasingly slow diffusion of iron, but iron is never completely depleted. In the diffusion-limited regime ( $k \geq 33$ , black area), iron is completely depleted at the cell surface, and thus the steady state concentrations do not depend on the aggregation level  $k$  anymore. Note that the uptake rate still decreases with increasing aggregation level, even though an equilibrium concentration is reached.

116 sion limitation already occurs at aggregation levels of  $k \geq 33$ , i.e. when iron particles  
117 have a diameter larger than only 0.3 nm (Fig. 2a). We determined the equilibrium  
118 distribution of iron aggregates by solving the spherically symmetric diffusion process  
119 (see Methods and Völker & Wolf-Gladrow, 1999). The distribution of particles at  
120 steady state (Fig. 2b) illustrates that in the transport-limited regime ( $k < 33$ ), iron  
121 is never completely depleted at the cell surface, even though the iron concentration  
122 decreases towards the cell surface. In contrast, in a diffusion-limited regime, iron is  
123 completely depleted at the cell surface and only approaches background concentration  
124 levels at a distance of over four cell radii. Under these conditions, the required time  
125 for a cell to take up sufficient iron to divide can reach up to days, for  $k \approx 10^8$ , or  
126 weeks, for  $k \approx 10^{11} - 10^{12}$  (at an iron concentration of  $\rho_0 = 0.1$  nM; see Methods).  
127 Thus, a main consequence of low iron solubility is that cells can suffer from strong  
128 diffusion limitation, even at high iron concentrations.

129 Transport limitation can be alleviated at the cell membrane, for example through  
130 more efficient or more numerous transporters. Diffusion limitation, however, can  
131 only be overcome by influencing iron away from the cell. Secreted molecules like  
132 siderophores can modify iron sources and alter their transport properties to increase  
133 diffusion (Fig. 1, bottom). In the following, we will hence quantify the effect of  
134 siderophore secretion on overcoming diffusion limitation by increasing the diffusion  
135 speed of iron.

### 136 ***Secreted siderophores can transiently increase the uptake rate*** 137 ***of iron from large aggregates by accelerating diffusion***

138 We next investigated whether siderophore secretion could alleviate diffusion limita-  
139 tion. In addition to the diffusion of iron, we accounted for free (unbound) siderophores  
140 that are produced at the cell surface and diffuse away from the cell, as well as the  
141 reaction of free siderophores with iron resulting in siderophore-iron complexes outside  
142 the cell (Fig. 1b). These complexes diffuse freely and can be taken up by the cell upon  
143 an encounter. We model these processes using a set of reaction-diffusion equations  
144 (see Methods). In order to investigate the direct effects of iron uptake mediated by  
145 secreted iron chelators, we excluded the possibility that cells take up free, unbound  
146 iron in these calculations.

147 Because siderophore-iron complexes are smaller than most iron aggregates, their  
148 diffusion coefficients are generally larger. This leads to accelerated diffusion that



149 could potentially mitigate the limitation caused by the slow movement of large iron  
150 aggregates. We find that the effects of secreting siderophores depend both on the  
151 size of the iron aggregate and whether the system is still in a transient phase or has  
152 already reached steady state. In the presence of highly aggregated iron, siderophore  
153 secretion indeed results in a high uptake rate that surpasses that of direct uptake  
154 (Fig. 3, solid versus dashed lines). However, this increase is only transient: As the  
155 cell starts to produce siderophores, these solubilize the large, slowly moving aggregates  
156 close to the cell into small, fast-moving iron-siderophore chelates. This leads to an  
157 initial increase in the iron uptake rate, within the first seconds under our conditions  
158 (Fig. 3). However, the cell rapidly consumes the chelates in its proximity, and is  
159 surrounded more and more by unbound siderophores that do not encounter iron  
160 particles (Supp. Fig. S1). Therefore, as iron around the cell becomes depleted, the  
161 uptake rate begins to slowly decrease towards the equilibrium value: This decrease  
162 can take days or months, depending on the iron aggregation level (Fig. 3). At eventual  
163 equilibrium, the generation of iron-bound siderophores relies on the diffusion of large  
164 iron aggregates towards the cell. This results in the formation of a boundary layer  
165 at a distance  $R^*$  from the cell, where siderophores chelate unbound iron (see Supp.  
166 Fig. S1). Because this process is limited by the diffusion of iron to the boundary  
167 layer, the cell suffers from diffusion limitation equal to the case of direct iron uptake.  
168 Therefore, the equilibrium uptake rate is roughly the same as the direct uptake rate,  
169 for large enough siderophore secretion rates or low iron concentrations,  $R_B \gg D_F \rho_o / P$   
170 (see Methods, Eq. 13). Overall, siderophore secretion increases the iron uptake rate  
171 compared to direct uptake, however only during a – potentially long – transient phase.

172 If iron is present in small aggregates, i.e. highly soluble, the equilibrium uptake  
173 rate reached via siderophore secretion is mostly far below the direct uptake rate: re-  
174 leasing siderophores slows down iron acquisition. In this regime, the *fast diffusion*  
175 *limit*, the diffusion speed of iron is sufficiently high that the background concentration  
176 of iron can be assumed constant (see Methods, Eq. 14). Secretion slows down uptake  
177 because of two factors: First, siderophores must encounter iron and bind it, introduc-  
178 ing an additional step prior to uptake. Second, the diffusion speed of siderophore-iron  
179 complexes is lower than that of free iron for  $k < 1000$ , thus reducing the flux of bound  
180 iron towards the cell. For small iron aggregates (highly soluble iron), siderophore se-  
181 cretion thus actually slows down uptake. Therefore, for a range of  $k = 33$  to  $k = 1000$   
182 (at an iron concentration of 0.1 nM), the cell is diffusion-limited, but secretion of si-  
183 derophores is not effective at overcoming this limitation.

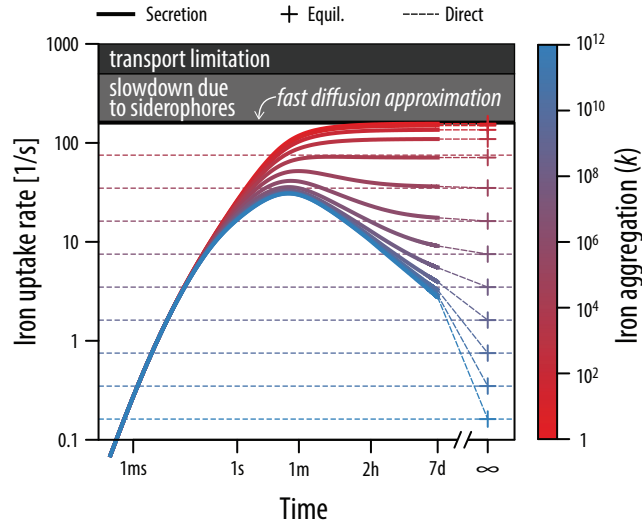

**Figure 3: Uptake rate for secreter cells.** The solid lines show the iron uptake rate for cells that secrete siderophores at a rate  $P = 0.045$  amol/h. The dashed lines in the background show the corresponding direct uptake rate for reference. The uptake rate initially increases as the concentration of siderophores builds up. For low aggregation levels (reddish solid lines), the uptake rate eventually approaches the fast diffusion approximation: the approximation for the maximum uptake rate using a secretion strategy for small aggregates (bottom of grey box; see Methods). For large aggregation levels (bluish solid lines), a transient peak in the uptake rate is reached that is well above direct uptake levels, and the uptake rate only slowly approaches the equilibrium value (+ symbols). The dark grey area indicates the maximum uptake rate limited by transport into the cell.

184 To access poorly soluble iron, cells could also, instead of secreting siderophores,  
185 increase their own diffusion coefficient by engaging in swimming motility. However,  
186 to achieve sufficient iron uptake, the cell would need to swim at a significant speed:  
187 Already for moderate iron aggregation levels of  $k > 10^5$ , the cell would need to  
188 increase its diffusion coefficient over 100-fold to reach an effect comparable to sider-  
189 ophore secretion at a rate of 1 amol/s upwards (see Supplementary Information for  
190 more detailed discussion). While this is within the range of measured swimming  
191 speeds, especially for marine bacteria (Stocker & Seymour, 2012), swimming also  
192 implies large metabolic costs (Mitchell, 2002; Taylor & Stocker, 2012), and this is  
193 likely exasperated in nutrient poor environments. Our model calculations show that  
194 siderophore secretion is an alternative to active motility.

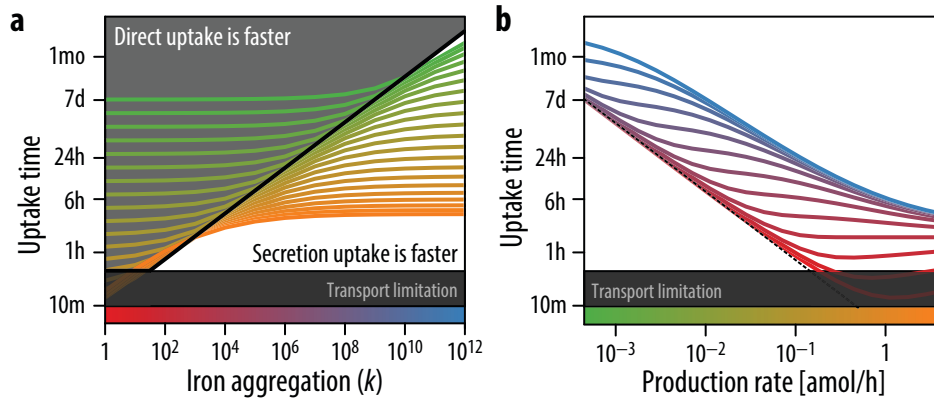

**Figure 4: Uptake time for secreter cells.** **a.** The time required to take up enough iron for division ('uptake time') depends on the iron aggregation level and the siderophore production rate. The black line indicates the uptake time for a cell relying on direct uptake. Aggregation level and production rate combinations that fall to the left of this line are values where secretion-based uptake is slower than direct uptake (grey area). Aggregation level and production rate combinations that fall to the right are conditions where secretion-mediated uptake is faster (white area). For low iron aggregation levels, a secreter has higher uptake times than a non-secreter, unless it produces siderophores at a very high rate ( $> 1$  amol/h). For large iron aggregation levels, a secreter shortens its uptake time compared to a non-secreter, even for low production rates ( $< 0.01$  amol/h). The full color scale for the production rate is shown in Panel b on the x-axis. **b.** Uptake time is influenced by the siderophore production rate. For highly dissolved iron (more red lines) or very low production rates, this relationship is almost linear. For highly aggregated iron (more blue lines), the effect is slightly reduced (blue lines not as steep). For low aggregation levels, or low levels of production for high aggregation levels (not visible), the uptake time is well approximated by the fast diffusion approximation (dashed line). As the production rate increases from very low levels, the relationship between production rate and uptake time flattens out, indicating that an increase in production rate only has a small effect on reducing the uptake time. As the production rate increases further, the effect on reducing uptake time becomes stronger again. The flattest range corresponds to where the secretion and direct uptake strategies result in approximately the same uptake time. The full color scale for the aggregation level is shown in Panel a on the x-axis.

## 195 ***The effect of siderophore secretion depends on siderophore pro-*** 196 ***duction rate and iron aggregation***

197 In the previous section we showed that siderophore secretion can transiently speed  
198 up iron acquisition. To investigate how these transient effects scale with bacterial  
199 growth, we define the ‘uptake time’ as the required time until a cell has acquired  
200 enough iron to produce enough biomass to initiate cell division (assuming an iron  
201 content of  $10^6$  Fe atoms = 1.66 amol per cell (Andrews *et al.*, 2003); Fig. 4a). Note  
202 that, if cells are limited by iron only, the uptake time is equal to the inter-division  
203 time.

204 The increased iron uptake rate achieved by secretion at low iron solubility, al-  
205 though only transient, can significantly shorten the uptake time (Fig. 4a). A non-  
206 motile cell relying on direct physical contact has an uptake time of around 15 days  
207 for parameters close to the marine environment (iron concentration of  $\rho_0 = 0.1$  nM;  
208 aggregation level of  $k = 10^{10}$ , i.e. aggregate radius of around 215 nm). When a cell  
209 starts to secrete siderophores, the uptake time at these conditions is significantly re-  
210 duced to a few days or hours, depending on the production rate. Conversely, for low  
211 aggregation levels, i.e. highly soluble iron, a secreter cell has a longer uptake time  
212 than a cell using direct uptake. The uptake time is strongly influenced by the pro-  
213 duction rate of siderophores. Overall, the higher the siderophore production rate, the  
214 wider the range of environments in which siderophore secretion speeds up iron ac-  
215 quisition compared to direct uptake. At low  $k$  and low siderophore production rates,  
216 the uptake time decreases linearly with the production rate (slope  $-1$  of red line in  
217 Fig. 4b). Hence, a two-fold increase in the secretion rate of siderophores leads to  
218 roughly a two-fold decrease in the uptake time. For large aggregation levels (high  $k$ ),  
219 the uptake time generally decreases close to, but less than linearly with production  
220 rate (blue line, Fig. 4b). Thus, an increase in production rate still has a positive effect  
221 on the uptake time, though the return is diminished. For intermediate aggregation  
222 states, the system transitions from having non-zero concentration of unbound iron  
223 to a depletion of iron in the close proximity of the cell. In this regime, an increase  
224 in production rate has almost no effect on the uptake time (flattening of the lines  
225 in Fig. 4b). Such parameter combinations of aggregation level and production rate  
226 are also where the uptake time of both strategies is roughly similar. The diminished  
227 returns in these regimes indicate that the secreter needs to drastically increase its  
228 production rate to gain marginal benefits over a direct uptake strategy.

229 The cost of producing such a high number of siderophores is difficult to estimate,  
230 since the negative effect of siderophore production on growth, due to resources spent  
231 on production instead of cell division, likely depends on environmental parameters  
232 such as the level of resource limitation (Brockhurst *et al.*, 2008). However, to obtain  
233 an estimate of the magnitude and efficiency of siderophore production, we calculated  
234 how many siderophore molecules need to be produced in order to take up one iron  
235 ion (a similar approach to (Völker & Wolf-Gladrow, 1999)). For a low siderophore  
236 secretion rate of 0.045 amol/h and an aggregation level of  $k = 10^{10}$ , a secreter must  
237 release around 10 siderophores to take up one iron ion. However, this secretion rate  
238 leads to relatively slow uptake with an uptake time of around 15 days at an iron  
239 concentration of  $\rho_0 = 0.1$  nM. Faster uptake is achieved through higher siderophore  
240 secretion rates, though this also implies that more siderophores per iron are secreted:  
241 a secretion rate of 4.5 amol/h results in a division time of 45 hours, requiring around  
242 120 secreted siderophores per iron taken up at an iron concentration of  $\rho_0 = 0.1$  nM  
243 and for  $k = 10^{10}$ .

### 244 ***Synergistic siderophore production between two neighboring cells*** 245 ***can occur over a wide range of parameters***

246 High siderophore production rates probably require a substantial investment of cel-  
247 lular resources. One way to reduce the production effort is cooperative production  
248 of siderophores in groups of cells. Siderophore-iron chelates that diffuse from one  
249 producer cell might still benefit a producing neighbor cell. Furthermore, if the cells  
250 share their siderophores, each cell might have to produce fewer siderophore molecules.  
251 The outcome of such interactions is not easily predictable, though, since each cell is  
252 both a source of siderophores and also a sink of iron-bound chelates.

253 Siderophore production in a group of cells has been shown to increase the efficiency  
254 of accessing iron-bound siderophores thanks to an accumulation of siderophores in the  
255 neighborhood of the cells (Völker & Wolf-Gladrow, 1999). However, these results did  
256 not consider the effect of poorly soluble iron aggregates. In our model we observe  
257 that, especially in the case of poorly soluble iron, siderophore production affects and  
258 alters the environment in a large neighborhood around the cell. Iron-bound sidero-  
259 phore chelates build up at distances of several hundred  $\mu\text{m}$  (see Supp. Fig. S1), thus  
260 potentially allowing for cooperative interactions between cells located at significant  
261 distances. Our model indicates that both costs and benefits are influenced by the

262 solubility of iron: First, at low iron solubility fast uptake from large iron aggregates  
263 entails a high siderophore-to-iron expenditure ratio, indicating that an important  
264 proportion of siderophores is lost to the producer cell even if no other cell is present.  
265 Thus, direct of costs of sharing may be minimal at low solubility. Second, the benefits  
266 of sharing siderophore production with a producing neighbor cell are influenced by  
267 the beneficial returns of increasing siderophore production rate (Fig. 4b).

268 We investigated a first stage of growth in a group of cells by considering the  
269 interactions between two cells. We measured the average number of siderophores  
270 produced by a secreter cell per iron taken up during the uptake time. The net effect  
271 of growing in proximity to another cell depends on how much a cell suffers from  
272 competition for iron-bound siderophores compared to how much it benefits from the  
273 siderophores produced by its neighbor. If sharing siderophores is synergistic, i.e. more  
274 efficient in a group, a cell has to produce fewer siderophores to take up one iron ion  
275 when a producing neighbor is present. We first quantified how much a siderophore-  
276 secreting cell is negatively influenced by the presence of a second cell by implementing  
277 this cell as a iron-siderophore chelate sink (comparable to cheater cells in Griffin *et al.*,  
278 2004). We assume that the second cell does not produce siderophores, but still can  
279 take up iron bound to siderophores (but not free iron). We measure the negative effect  
280 (or cost) in terms of how many more siderophores the secreter cell needs to produce on  
281 average to take up one iron, relative to a situation where no other cell were present.  
282 A value of 1 indicates that the production effort of the producer is not altered by  
283 the presence of the nonproducing cell, whereas a value of e.g. 2 means that twice as  
284 many siderophores need to be produced to take up one iron. We find that, while the  
285 degree of iron aggregation does not strongly influence the interaction, the distance  
286 between the cells plays a key role (Fig. 5c). If the two cells were (hypothetically)  
287 at the exact same point in space, then all iron-siderophore chelates that arrive at  
288 the cells are shared evenly between the two, and the producing cell needs to produce  
289 approximately the double amount of siderophores (only approximately because the  
290 uptake rate is not linear in time, see Fig. 4b). As the distance between the two cells  
291 increases, the negative effect on the producer decreases (Fig. 5c). For a secretion rate  
292 of 4.5 amol/h, the loss of siderophores to the neighboring cell at distances larger than  
293 10  $\mu\text{m}$  has a negligible effect on the producing cell (Supp. Fig. S5). At the same time,  
294 at these distances, the nonproducing cell is able to take up almost equivalent levels  
295 of iron as the secreting cell (Fig. 5d). Thus, siderophores can efficiently be taken up  
296 by the neighboring cell at a very low cost to the producer, because the non-producer

297 benefits from the siderophores that would likely be lost to the producer anyway. Iron  
298 aggregation has a strong influence only in one aspect: The nonproducing cell, even if  
299 located at large distances from the producer, can still benefit from the siderophores,  
300 however only if iron is aggregated. If iron is highly dissolved, most chelates are  
301 produced close to the cell (Supp. Fig. S1) and are rapidly taken up by the producer,  
302 such that the nonproducing cell is only able to take up a fraction of the iron relative  
303 to the producing cell (Fig. 5d).

304 Since the benefits of siderophore secretion can be shared with neighboring cells  
305 at relatively short distances without additional costs to the producing cell, we next  
306 examined how joint secretion may be synergistically beneficial for cells. We measure  
307 benefit here as a reduction in the amount of siderophores secreted to achieve uptake  
308 of one iron ion. If this value is 1, then there is no net effect of the presence of another  
309 cell, and competitive and cooperative effects balance each other. A value larger than  
310 1 indicates that there is a net negative effect due to competition, i.e. cells suffer  
311 from their neighbors taking up iron-bound siderophores. On the other hand, a value  
312 smaller than 1 means that both cells benefit from the presence of another producer,  
313 because they efficiently share siderophores. As a result, each cell has to secrete fewer  
314 siderophores to take up the same amount of iron. Over a large range of separation  
315 distances ( $> 10 \mu\text{m}$  for  $P = 4.5 \text{ amol/h}$ ), cells can share the benefits of secretion  
316 without an additional cost due to competition (blue-green areas in Fig. 5e), and  
317 cooperative effects are thus greater than competitive effects. The magnitude of the  
318 synergistic effect, however, depends on the marginal benefit of increased siderophore  
319 production rate, i.e. the slope in Fig. 4b. For production levels that only result in a  
320 small increase in iron uptake, the marginal benefit of an additional producer cell is  
321 small (black areas in Fig. 5e), which is the case for iron aggregates of intermediate size.  
322 At other conditions, however, there is a strong effect and the amount of siderophores  
323 produced for the uptake of 1 iron can be reduced almost twofold.

324 The outcome of social interactions is therefore strongly influenced by the physical  
325 properties of iron, in particular the diffusion coefficient. Highly soluble and insoluble  
326 iron sources enable synergistic interactions, whereas medium-sized aggregates do not.  
327 Overall, we find that at the majority of our conditions, siderophore secretion can lead  
328 to synergistic interactions between two neighboring siderophore producing cells. This  
329 aids in making the secretion of siderophores a favorable strategy in a wide range of  
330 environments compared to direct uptake (Fig. 5d).

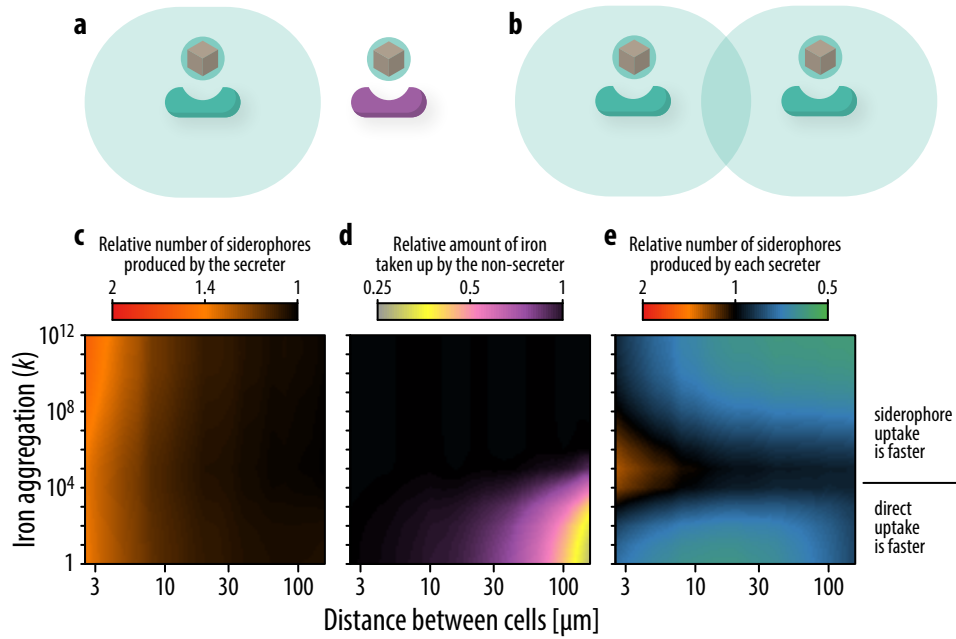

**Figure 5: Effect of two competing cells on each other.** a,c,d. Only the secretor produces siderophores, the non-secretor consumes iron-bound siderophores, but does not contribute to production. c. The relative increase in the average number of siderophores that need to be produced to take up one iron, relative to if the secretor was alone, depends on the distance between the cells. When the two cells are close, the amount of siderophores required increases almost twofold (orange area). However, when cells are at distances of  $>30 \mu\text{m}$ , the secretor does not need to produce additional siderophores (black area). d. The relative amount of iron acquired by the non-secretor in the time span the secretor takes up one iron ion is influenced by the cells' distance. The non-secretor acquires less iron relative to the secretor only for low aggregation levels and at large distances (purple/yellow area). b,e Both cells produce siderophores. e. Secretors can increase the uptake rate of a neighboring secretor at no or little additional cost, provided that the distance between cells is large enough. For low iron aggregation levels, this reduces the slowdown due to secretion compared to direct uptake (lower blue/green area). For high aggregation levels, this increases the acceleration of uptake by secreting siderophores. At intermediate aggregation levels the marginal benefit of producing additional siderophores is small, though, leading to no benefits or even net costs (black and orange area, respectively).



## 331 Discussion

332 The ubiquity of bacterial siderophore secretion despite the risk of siderophore loss  
333 and the evolutionary fragility it entails has stimulated a large body of research (Grif-  
334 fin *et al.*, 2004; Kümmerli & Brown, 2010; Dumas & Kümmerli, 2012). Here, we  
335 suggest that the release of siderophores is essential for their function, potentially ex-  
336 plaining why this uptake strategy is so widespread. We show that low iron solubility,  
337 present in many environments, can strongly slow down iron uptake if no siderophores  
338 are released. Secreted siderophores solubilize iron and generate small chelates with  
339 significantly increased diffusion speed. However, our results show that secretion of  
340 siderophores only increases iron acquisition rates when iron aggregates are large, and  
341 is generally not beneficial at high solubility, when aggregates are small.

342 In vertebrate hosts, iron is not aggregated, but solubilized by chelating proteins,  
343 e.g. transferrin or lactoferrin (Baker & Baker, 2005; Gomme *et al.*, 2005). Our results  
344 suggest that such environments containing solubilized iron should not be conducive to  
345 siderophore-based iron uptake. However, the chelating host proteins are considerably  
346 larger than siderophores, such that siderophores would still accelerate the diffusion of  
347 iron: Transferrin and lactoferrin have a molar mass of around 79 kilodaltons, whereas  
348 the molar mass of siderophores ranges from around 0.1–1.4 kilodaltons (Kümmerli  
349 *et al.*, 2014). The magnitude of this acceleration will likely be smaller than in en-  
350 vironments with poorly soluble iron, potentially explaining why some pathogenic  
351 bacteria use receptors for direct uptake of iron-chelate complexes instead of sidero-  
352 phores (Braun & Killmann, 1999) and why pathogens can lose siderophore systems  
353 during adaptation to the host environment (Andersen *et al.*, 2015; Marvig *et al.*,  
354 2014).

355 In our model we have made two assumptions that potentially strongly disfavour  
356 a siderophore secretion strategy. First, secreter cells cannot take up iron through  
357 direct physical contact. It is likely, however, that siderophore-producing cells are  
358 able to take up iron that is directly encountered, since bacteria possess several iron  
359 uptake systems (Andrews *et al.*, 2003; Wandersman & Delepelaire, 2004). In this  
360 case, a siderophore producer can take up fast diffusing small iron aggregates as well,  
361 mitigating the negative effects of acquisition slowdown at high iron solubility. Second,  
362 we assume that large iron aggregates are immediately taken up by a non-producing cell  
363 upon physical encounter. Realistically, cells would need to process the iron aggregates,  
364 thus slowing down the direct uptake of large aggregates. By using siderophores, cells

365 can “pre-process” this iron for fast uptake at a distance from the cell. Since both of  
366 these assumptions enhance the benefits of direct uptake we measure in our results,  
367 the environments predicted by our model to be conducive to siderophore secretion  
368 are likely conservative estimates.

369 Siderophore secretion is often cited as one of the central examples for diffusible  
370 public goods in the study of the evolution of cooperation (Velicer, 2003; Griffin *et al.*,  
371 *et al.*, 2004; Kümmerli *et al.*, 2009; Allen *et al.*, 2013). Secreted molecules, such as  
372 siderophores, are at risk of being “stolen” by a cheater genotype that avoids the  
373 cost of production, but reaps the benefits. The current consensus is that coopera-  
374 tion by means of secreted public goods is stabilized by spatially structured environ-  
375 ments, as this increases the probability of interactions between identical genotypes,  
376 and consequentially decreases the probability of interactions between producers and  
377 cheats (Kümmerli *et al.*, 2009; Nadell *et al.*, 2010; Julou *et al.*, 2013; Allen *et al.*,  
378 2013). Only few of these studies, however, have considered the process of diffusion  
379 of the public good to the full extent (Vetter *et al.*, 1998; Allison, 2005; Folse & Alli-  
380 son, 2012; Allen *et al.*, 2013; Dobay *et al.*, 2014). More importantly, game-theoretical  
381 studies mostly model the diffusive public good itself as a carrier of some benefit (Allen  
382 *et al.*, 2013; Dobay *et al.*, 2014). In our study, we consider a more realistic view of  
383 the mechanism of siderophore-based iron uptake. A secreted siderophore *per se* is  
384 useless to the cell, and any neighbouring cell, until it encounters and chelates iron.  
385 A detailed understanding of how the benefit of siderophores, efficient iron uptake,  
386 is generated, emphasizes the importance of diffusion of siderophores. At low iron  
387 solubility, secreted siderophores are a means to overcome diffusion limitation, and  
388 hence the diffusion away from the producer cell is part of the siderophore’s function.  
389 Therefore, reduced diffusivity of siderophores (Martinez *et al.*, 2003; Kümmerli *et al.*,  
390 2014; Scholz & Greenberg, 2015) can likely stabilize siderophore production in the  
391 face of the public goods dilemma, but it probably also reduces the efficiency with  
392 which siderophores improve iron uptake at low iron solubility.

393 The location of where benefits of siderophores are generated is the result of a com-  
394 plex interplay between iron sources and the producer’s location. This is likely to have  
395 an effect on the interactions between all types of cells. Therefore, abiotic properties  
396 of the environment, in this case the diffusivity of iron, can play an important role  
397 in social interactions between cells, and need be taken into account when consider-  
398 ing cooperative dynamics. The same also applies to other secreted metabolites that  
399 interact with large slow substrates, such as chitinases secreted to degrade chitin, or

400 other extracellular degrading enzymes (cellulase, exoprotease).

401 We suggest that when analyzing microbial competition and cooperation it is im-  
402 portant to consider two different length scales: (1) the length of competition, i.e.  
403 the distance between neighboring producers at which they compete for the shared  
404 resource, in this case the iron-bound siderophores; and (2) the length of synergism,  
405 i.e. the distance at which the neighboring producers synergistically utilize the sider-  
406 ophores produced. Our model shows that typically the length scale of competition is  
407 much shorter than the length scale of synergism. This allows neighbouring producer  
408 cells to jointly increase the global siderophore production without paying additional  
409 costs due to competition. Thus, the benefits of siderophore secretion increase with  
410 the number of cells, while the costs per cell stay constant, if the cells are sufficiently  
411 spaced. This could set the basis for successful cooperative interactions in the secretion  
412 of many compounds.

## 413 **Acknowledgements**

414 We thank Thierry Sollberger for help with designing Figures 1 and 5 as well as Roman  
415 Stocker, Laura Sigg and Stephan Kraemer for helpful discussions. KTS and MA were  
416 supported by Eawag and ETH Zurich. GEL and KTS were supported by the Swiss  
417 National Science Foundation.

## 418 **Conflict of Interest**

419 The authors declare that they have no conflict of interest.

## 420 Methods

### 421 *Direct uptake*

422 In the direct uptake case, iron is taken up when a cell encounters an iron aggregate.  
423 If we assume a spherical cell with radius  $r_B$ , then the probability that a spherical iron  
424 aggregate starting at a distance  $r$  from the cell encounters the cell before time  $t$  is  
425 just the hitting probability of a random walk (Crank, 1975; Frazier & Alber, 2012),

$$p_{\text{col}}(r) = \frac{R}{r} \operatorname{erfc} \left( \frac{r - R}{\sqrt{4Dt}} \right), \quad (2)$$

426 with total radius  $R = r_B + r_{\text{Fe}}$  and effective diffusion coefficient  $D = D_B + D_{\text{Fe}}$ . The  
427 diffusion coefficient is,  $D = k_B T / 6\pi h r$ , where  $k_B \approx 1.38 \times 10^{-23} \text{ JK}^{-1}$  is Boltzmann's  
428 constant,  $T = 293 \text{ K}$  is ambient temperature,  $h = 1.003 \text{ mPa}\cdot\text{s}$  is the viscosity of  
429 water at ambient temperature, and  $r$  is the radius of the spherical particle in meters.  
430 By summing the diffusion coefficients to an effective diffusion coefficient, we fix the  
431 reference frame of the iron particle to the bacterium and subsume the movement of the  
432 bacterium into the movement of the iron particle. As a simplification, we assume that  
433 the cell is stationary in space, and thus the effective diffusion coefficient is  $D \approx D_{\text{Fe}}$ .  
434 Note that generally iron diffusion is faster than the cell,  $r_B \gg r_{\text{Fe}}$ , so that in most  
435 cases  $D_B + D_{\text{Fe}} \approx D_{\text{Fe}}$  is an acceptable approximation.

436 The total number of particles that have collided with the bacterium by time  $t$  is,

$$N(t) = \int_{r=R}^{\infty} p_{\text{col}}(r) dn(r),$$

437 where  $dn(r)$  is the number of particles at a distance  $r$ . If the concentration of iron  
438 is  $\rho$  and the iron particles are equally distributed in space, then  $dn(r) = \rho \cdot 4\pi r^2 dr$ .  
439 Thus the total number of particles becomes,

$$N(t) = 4\pi\rho R \int_{r=R}^{\infty} \operatorname{erfc} \left( \frac{r - R}{\sqrt{4Dt}} \right) dr.$$

440 We assume that all iron particles are aggregates of size  $k$  and that the total concen-  
441 tration of iron is  $\rho_0 = k \cdot \rho_k$ , where  $\rho_k$  is the concentration of particles of size  $k$ . The

442 number of particles of size  $k$  that have collided with the bacterium at time  $t$  is,

$$N_k(t) = \rho_k t \cdot 4\pi R_k D_k \left( 1 + \frac{2R_k}{\sqrt{\pi D_k t}} \right),$$

443 with  $R_k = (r_B + k^{1/3} r_{\text{Fe}})$  and  $D_k = k_B T / (6\pi h \cdot k^{1/3} r_{\text{Fe}})$ . At best, a bacterium can  
444 completely take up a  $k$ -aggregate, such that the total amount of absorbed iron is,

$$I_k(t) = k N_k(t) = \rho_0 t \cdot 4\pi R_k D_k \left( 1 + \frac{2R_k}{\sqrt{\pi D_k t}} \right). \quad (3)$$

445 Note that the assumption that bacteria can take up complete iron aggregates is equiv-  
446 alent to assuming that the iron is fully dissolved, but that the individual atoms diffuse  
447 with a reduced diffusion coefficient  $D_k$ . In this case, the concentration of iron,  $F(r, t)$ ,  
448 can be equivalently represented as a spherically symmetrical diffusion process,

$$\frac{\partial F}{\partial t} + \frac{1}{r^2} \frac{\partial}{\partial r} \left( r^2 D_k \frac{\partial F}{\partial r} \right) = 0 \quad (4)$$

449 with an absorbing boundary at  $r = R_k$ , a reservoir at infinity,  $\lim_{r \rightarrow \infty} F(r, t) = \rho_0$ ,  
450 and initial concentration  $F(r, 0) = \rho_0$ . The general equilibrium solution to Eq. 4 with  
451  $\partial_t F(r, t) = 0$  is  $\tilde{F}(r) \equiv \lim_{t \rightarrow \infty} F(r, t) = \rho_0 - c/r$ . The constant  $c$  is found by the  
452 boundary condition at  $r = R_k$ . On the one hand we require  $F(R_k, t) \geq 0$ , and thus  
453  $c \leq R_k \rho_0$ . On the other hand the iron uptake is limited by the maximal transport  
454 rate. The flux across the cell surface is,

$$J = D_k \left( \partial_r \tilde{F} \right) \Big|_{r=R_k} = \frac{D_k c}{R_k^2},$$

455 and thus the maximal flux for  $c^{\text{max}} = R_k \rho_0$  is  $J^{\text{max}} = D_k \rho_0 / R_k$ , the same as the  
456 asymptotic limit of Eq. 3. We say that the cell is iron-diffusion limited if the maximal  
457 flux is smaller than the maximally possible transport rate, i.e.  $J^{\text{max}} < \alpha$  (see Fig. 2b).

## 458 *Siderophore-mediated uptake*

The iron uptake by a single secreting cell is modelled as a reaction-diffusion process for free iron,  $F$ , unbound siderophores,  $X$ , and bound siderophores,  $Y$ ,

$$\frac{\partial F}{\partial t} = D_k \nabla^2 F - \kappa_k F X, \quad (5)$$

$$\frac{\partial X}{\partial t} = D_X \nabla^2 X - \kappa_k F X, \quad (6)$$

$$\frac{\partial Y}{\partial t} = D_Y \nabla^2 Y + \kappa_k F X. \quad (7)$$

When we only consider a single cell, the system is spherically symmetric. Thus the reaction-diffusion equations become (see also Völker & Wolf-Gladrow, 1999),

$$\frac{\partial F}{\partial t} = \frac{1}{r^2} \frac{\partial}{\partial r} \left( r^2 D_k \frac{\partial F}{\partial r} \right) - \kappa_k F X, \quad (8)$$

$$\frac{\partial X}{\partial t} = \frac{1}{r^2} \frac{\partial}{\partial r} \left( r^2 D_X \frac{\partial X}{\partial r} \right) - \kappa_k F X, \quad (9)$$

$$\frac{\partial Y}{\partial t} = \frac{1}{r^2} \frac{\partial}{\partial r} \left( r^2 D_Y \frac{\partial Y}{\partial r} \right) + \kappa_k F X. \quad (10)$$

459 We assume that the binding affinity is the same for all aggregation levels,  $\kappa_k \equiv \kappa =$   
 460  $10^6 \text{ M}^{-1} \text{ s}^{-1}$  and that the diffusion coefficient of free siderophores the same as for iron-  
 461 siderophore complexes. Initially, iron is equally distributed in space at a concentration  
 462 of  $F(r, 0) = \rho_0$  and there are no siderophores present,  $X(r, 0) = 0$ . We assume that  
 463 the concentration of free and bound siderophores tends to zero far away from the cell,  
 464  $\lim_{r \rightarrow \infty} X(r, t) = Y(r, t) = 0$ , and the concentration of iron is constant far away from  
 465 the cell,  $\lim_{r \rightarrow \infty} F(r, t) = \rho_0$ . The uptake rate of iron-siderophore complexes by the  
 466 cell is then just equal to the flux of  $Y$  at  $r = R_B$ ,

$$J = D_X (\partial_r Y(r, t))|_{r=R_B},$$

467 with a maximal rate of  $\alpha$  as in the direct uptake case.

468 To gain some analytical understanding of the equilibrium distributions, we con-  
 469 sider some limiting cases of the reaction-diffusion system.

470 **No reaction.** In absence of any reaction of siderophores with iron,  $\kappa = 0$ . In this  
471 case the equilibrium solution for the distribution of free siderophores is,

$$X^*(r) = \frac{PR_B^2}{D_X} \left( \frac{1}{r} - \frac{1}{R_\infty} \right), \quad (11)$$

472 where  $P$  is the excretion rate of siderophores from the cell. Here,  $R_\infty$  is the upper  
473 bound of the considered volume. For an open system,  $R_\infty \rightarrow \infty$ .

474 **Large aggregation.** When the level of aggregation is large, then the diffusion  
475 of free iron is much slower than the diffusion of free siderophores. But since the  
476 concentration of siderophores decreases with distance from the cell as a consequence  
477 of the spherical dilution, there exists a boundary at  $r = R^*$ , where the influx of free  
478 siderophores completely reacts with the influx of free iron.

479 Let  $\Delta X = \phi_X \Delta t$  and  $\Delta F = \phi_F \Delta t$  be the amount of  $X$  and  $F$  that enters a finite  
480 small volume during time  $\Delta t$ . Then the amount that reacts will be  $\Delta Y = \kappa \Delta F \Delta X$ .  
481 We are interested in the case where the all iron  $\Delta F$  reacts with all siderophores  
482  $\Delta X$ ,  $k \Delta X \Delta F = \Delta F$  and  $k \Delta X \Delta F = \Delta X$ , and hence,  $\Delta F = \Delta X$ , or,  $|\phi_X(R^*)| =$   
483  $|\phi_F(R^*)|$ .

484 Iron diffuses to  $r = R^*$  from above, and siderophores diffuse to  $r = R^*$  from  
485 below. Thus for  $r < R^*$ , the distribution of free siderophores follows Equation (11)  
486 with  $R_\infty = R^*$ . Equivalently, the distribution of iron for  $r > R^*$  follows that of freely  
487 diffusing iron,  $F(r) = \rho_0 (1 - R^*/r)$ . The fluxes are then,

$$\phi_X(r) = \frac{PR_B^2}{r^2},$$

488 and,

$$\phi_F(r) = -\frac{D_F \rho_0 R}{r^2}.$$

489 These are equal at,

$$R^* = \frac{PR_B^2}{D_F \rho_0}. \quad (12)$$

490 This defines a boundary at a distance  $r = R^*$  from the cell. Below this radius there  
491 are enough siderophores to bind all free iron and thus there is no free iron. Above this  
492 radius, all the siderophores have been bound. Hence at equilibrium, siderophore-iron  
493 complexes are only produced at this radius.

494 The distribution of siderophore-iron complexes above  $r = R^*$  then is,

$$Y^+(r) = \frac{PR_B^2}{D_X r}.$$

495 Below  $r = R^*$ ,  $Y^-(r) = Y^* \frac{1-R_B/r}{1-R_B/R^*}$ , where  $Y^* = Y^+(R_*) = \rho_0 D_F / D_X$ ,

$$Y^-(r) = \rho_0 \frac{D_F}{D_X} \frac{PR_B}{PR_B - D_F \rho_0} (1 - R_B/r).$$

496 Finally, this results in a flux at the cell of,

$$J_Y = \frac{\rho_0 D_F}{R_B - D_F \rho_0 / P}. \quad (13)$$

497 This converges to the maximal direct uptake flux,  $J = \rho_0 D_F / R_B$ , for secretion rates

498  $P \gg D_F \rho_0$ .

**Fast diffusion.** If the diffusion speed of free iron is fast compared to the reaction speed of siderophores, then the background concentration of free iron can be assumed constant. The reaction-diffusion equations then become,

$$\begin{aligned} \frac{\partial X}{\partial t} &= \frac{1}{r^2} \frac{\partial}{\partial r} \left( r^2 D_X \frac{\partial X}{\partial r} \right) - \kappa_0 X, \\ \frac{\partial Y}{\partial t} &= \frac{1}{r^2} \frac{\partial}{\partial r} \left( r^2 D_X \frac{\partial Y}{\partial r} \right) + \kappa_0 X, \end{aligned}$$

with  $\kappa_0 = \kappa \rho_0$ . The equilibrium solutions to these equations for boundary conditions  $\lim_{r \rightarrow \infty} X(r) = \lim_{r \rightarrow \infty} Y(r) = 0$ ,  $\phi_X(R_B) = -D_X \partial_r X(r = R_B) = P$  and  $Y(R_B) = 0$  is (see Völker & Wolf-Gladrow, 1999),

$$\begin{aligned} X(r) &= \frac{PR_B^2}{D_X r} \frac{e^{-(r-R_B)/L}}{1 + R_B/L} = X^*(r) \frac{e^{-(r-R_B)/L}}{1 + R_B/L} \\ Y(r) &= \frac{PR_B^2}{D_X r} \frac{1 - e^{-(r-R_B)/L}}{1 + R_B/L} = X^*(r) \frac{1 - e^{-(r-R_B)/L}}{1 + R_B/L}. \end{aligned}$$

499 Here,  $L = \sqrt{D_X / \kappa_0}$  is the characteristic diffusion-reaction length of siderophores with  
500 the background iron. The derivative of  $Y$  is,

$$\frac{\partial Y}{\partial r} = \frac{PR_B^2}{D_X (1 + R_B/L) r} \left( -\frac{1}{r} (1 - e^{-(r-R_B)/L}) + \frac{e^{-(r-R_B)/L}}{L} \right)$$



501 Hence, as derived in (Völker & Wolf-Gladrow, 1999), the maximum iron uptake rate  
502 is,

$$\phi_Y(R_B) = \frac{PR_B}{L + R_B}, \quad (14)$$

503 and the peak in the distribution is at a distance  $r$ , where

$$ye^{R_B/L-y} = 1, \quad y = r/L + 1. \quad (15)$$

## 504 **Numerical integration of the partial differential equations**

505 With exception of the single cell direct uptake case, no analytical solutions to the  
506 reaction-diffusion equations are available. We therefore numerically integrated the  
507 equations using a finite elements approach implemented in the FEniCS project version  
508 1.6 (Logg *et al.*, 2012). The FEniCS software suite uses the variational formulation  
509 of the PDEs on meshes.

510 **Single cell.** For the single cell case, we exploited the spherical symmetry and used  
511 a linear expanding mesh between  $R_B = 1 \mu\text{m}$  and  $R_\infty = 10 \text{m}$ , and  $m = 400$  mesh  
512 intervals,

$$r_i = R_B + (R_\infty - R_B) \left( \frac{i\Delta r - R_B}{R_\infty - R_B} \right)^4, \quad i \in [0, m],$$

513 where  $\Delta r = (R_\infty - R_B)/m$ . We solved the PDEs over discrete increasing time steps,  
514 with  $\Delta t_0 = 10^{-4} \text{s}$  and  $\Delta t_{j+1} = 1.2\Delta t_j$ , with a maximum time step of 1000 s (see also  
515 Supplementary Information).

**Two cells.** In the two cell case, the system only has cylindrical symmetric along  
the axis that connects the two cells,

$$\begin{aligned} \frac{\partial F}{\partial t} &= \frac{1}{r} \frac{\partial}{\partial r} \left( r D_F \frac{\partial F}{\partial r} \right) + D_F \frac{\partial^2 F}{\partial z^2} - \kappa F X, \\ \frac{\partial X}{\partial t} &= \frac{1}{r} \frac{\partial}{\partial r} \left( r D_X \frac{\partial X}{\partial r} \right) + D_X \frac{\partial^2 X}{\partial z^2} - \kappa F X, \\ \frac{\partial Y}{\partial t} &= \frac{1}{r} \frac{\partial}{\partial r} \left( r D_X \frac{\partial Y}{\partial r} \right) + D_X \frac{\partial^2 Y}{\partial z^2} + \kappa F X. \end{aligned}$$

516 We generated 2D  $(z, r)$ -meshes using the following procedure: We first created a  
517 circular domain of radius  $\rho_1 = 100 \mu\text{m}$ . We then removed two circular ‘cells’, with  
518 radius  $R_B$  and varying distance  $d$  from each other, from the domain. The domain

519 was then converted to a mesh using FEniCS with a mesh size of 10, and subsequently  
520 refining all mesh elements within the circle  $\rho = \rho_1/2$ . The mesh was finally expanded  
521 to a full radius of  $\rho_\infty = 0.1$  m, by adding concentric circles of  $m_2 = 24$  mesh points at  
522 increasing radii  $\rho_{j+1} = \rho_j(1 + 2\pi/m_2)$ . Finally, we integrated the 2D reaction-diffusion  
523 equations using an increasing time step,  $\Delta t_0 = 10^{-2}$  s and  $\Delta t_{j+1} = 1.2\Delta t_j$ , with a  
524 maximum time step of 1000 s.

## References

- 525
- 526 1. Allen, B., Gore, J. & Nowak, M. A. Spatial dilemmas of diffusible public goods.  
527 *Elife* **2**, e01169 (2013).
  - 528 2. Allison, S. D. Cheaters, diffusion and nutrients constrain decomposition by  
529 microbial enzymes in spatially structured environments. *Ecol Lett* **8**, 626–635  
530 (2005).
  - 531 3. Alnæs, M. *et al.* The FEniCS Project Version 1.5. *Archive of Numerical Software*  
532 **3**. ISSN: 2197-8263. doi:10.11588/ans.2015.100.20553. <[http://journals.  
533 ub.uni-heidelberg.de/index.php/ans/article/view/20553](http://journals.ub.uni-heidelberg.de/index.php/ans/article/view/20553)> (2015).
  - 534 4. Andersen, S. B., Marvig, R. L., Molin, S., Krogh Johansen, H. & Griffin, A. S.  
535 Long-term social dynamics drive loss of function in pathogenic bacteria. *Proc  
536 Natl Acad Sci U S A* **112**, 10756–61 (2015).
  - 537 5. Andrews, S. C., Robinson, A. K. & Rodriguez-Quinones, F. Bacterial iron home-  
538 ostasis. *FEMS Microbiol Rev* **27**, 215–37 (2003).
  - 539 6. Baker, E. N. & Baker, H. M. Molecular structure, binding properties and dy-  
540 namics of lactoferrin. *Cell Mol Life Sci* **62**, 2531–9 (2005).
  - 541 7. Boyd, P. W. & Ellwood, M. J. The biogeochemical cycle of iron in the ocean.  
542 *Nature Geosci* **3**, 675–682 (2010).
  - 543 8. Braun, V & Killmann, H. Bacterial solutions to the iron-supply problem. *Trends  
544 Biochem Sci* **24**, 104–9 (1999).
  - 545 9. Brockhurst, M. A., Buckling, A., Racey, D. & Gardner, A. Resource supply and  
546 the evolution of public-goods cooperation in bacteria. *BMC Biol* **6**, 20 (2008).
  - 547 10. Calef, D. F. & Deutch, J. M. Diffusion-Controlled Reactions. *Annu Rev Phys  
548 Chem* **34**, 493–524 (1983).
  - 549 11. Cornell, R. M., Giovanoli, R. & Schneider, W. Review of the hydrolysis of  
550 iron(III) and the crystallization of amorphous iron(III) hydroxide hydrate. *J  
551 Chem Technol Biotechnol* **46**, 115–134. ISSN: 1097-4660 (1989).
  - 552 12. Crank, J. *The Mathematics of Diffusion: 2d Ed* (Clarendon Press, 1975).

- 553 13. De Vos, D *et al.* Study of pyoverdine type and production by *Pseudomonas*  
554 *aeruginosa* isolated from cystic fibrosis patients: prevalence of type II pyover-  
555 dine isolates and accumulation of pyoverdine-negative mutations. *Arch Microbiol*  
556 **175**, 384–8 (2001).
- 557 14. Dobay, A, Bagheri, H. C., Messina, A, Kümmerli, R & Rankin, D. J. Interaction  
558 effects of cell diffusion, cell density and public goods properties on the evolution  
559 of cooperation in digital microbes. *J Evol Biol* **27**, 1869–77 (2014).
- 560 15. Dumas, Z & Kümmerli, R. Cost of cooperation rules selection for cheats in  
561 bacterial metapopulations. *J Evol Biol* **25**, 473–84 (2012).
- 562 16. Dusenbery, D. B. *Living at micro scale: the unexpected physics of being small*  
563 (Harvard University Press, 2009).
- 564 17. Fgaier, H. & Eberl, H. J. A competition model between *Pseudomonas fluorescens*  
565 and pathogens via iron chelation. *J Theor Biol* **263**, 566–78 (2010).
- 566 18. Folse 3rd, H. J. & Allison, S. D. Cooperation, competition, and coalitions in  
567 enzyme-producing microbes: social evolution and nutrient depolymerization rates.  
568 *Front Microbiol* **3**, 338 (2012).
- 569 19. Frazier, Z. & Alber, F. A computational approach to increase time scales in  
570 Brownian dynamics-based reaction-diffusion modeling. *J Comput Biol* **19**, 606–  
571 18 (2012).
- 572 20. Gomme, P. T., McCann, K. B. & Bertolini, J. Transferrin: structure, function  
573 and potential therapeutic actions. *Drug Discov Today* **10**, 267–73 (2005).
- 574 21. Griffin, A. S., West, S. A. & Buckling, A. Cooperation and competition in  
575 pathogenic bacteria. *Nature* **430**, 1024–7 (2004).
- 576 22. Hider, R. C. & Kong, X. Chemistry and biology of siderophores. *Nat Prod Rep*  
577 **27**, 637–57 (2010).
- 578 23. Julou, T. *et al.* Cell-cell contacts confine public goods diffusion inside *Pseu-*  
579 *domonas aeruginosa* clonal microcolonies. *Proc Natl Acad Sci U S A* **110**, 12577–  
580 82 (2013).
- 581 24. Kraemer, S. Iron oxide dissolution and solubility in the presence of siderophores.  
582 *Aquat Sci* **66**, 3–18 (2004).

- 583 25. Kuhn, K. M., DuBois, J. L. & Maurice, P. A. Strategies of aerobic microbial  
584 Fe acquisition from Fe-bearing montmorillonite clay. *Geochim Cosmochim Acta*  
585 **117**, 191–202. ISSN: 0016-7037 (2013).
- 586 26. Kümmerli, R. & Brown, S. P. Molecular and regulatory properties of a public  
587 good shape the evolution of cooperation. *Proc Natl Acad Sci U S A* **107**, 18921–  
588 6 (2010).
- 589 27. Kümmerli, R., Schiessl, K. T., Waldvogel, T., McNeill, K. & Ackermann, M.  
590 Habitat structure and the evolution of diffusible siderophores in bacteria. *Ecol*  
591 *Lett* **17**, 1536–44 (2014).
- 592 28. Kümmerli, R., Griffin, A. S., West, S. A., Buckling, A. & Harrison, F. Vis-  
593 cous medium promotes cooperation in the pathogenic bacterium *Pseudomonas*  
594 *aeruginosa*. *Proc Biol Sci* **276**, 3531–8 (2009).
- 595 29. Logg, A., Mardal, K.-A., Wells, G. N., *et al.* *Automated Solution of Differential*  
596 *Equations by the Finite Element Method* ISBN: 978-3-642-23098-1. doi:10.1007/  
597 978-3-642-23099-8 (Springer, 2012).
- 598 30. Marshall, B., Stintzi, A., Gilmour, C., Meyer, J.-M. & Poole, K. Citrate-mediated  
599 iron uptake in *Pseudomonas aeruginosa*: involvement of the citrate-inducible  
600 FecA receptor and the FeoB ferrous iron transporter. *Microbiology* **155**, 305–15  
601 (2009).
- 602 31. Martinez, J. S. *et al.* Structure and membrane affinity of a suite of amphiphilic  
603 siderophores produced by a marine bacterium. *Proc Natl Acad Sci U S A* **100**,  
604 3754–9 (2003).
- 605 32. Marvig, R. L. *et al.* Within-host evolution of *Pseudomonas aeruginosa* reveals  
606 adaptation toward iron acquisition from hemoglobin. *MBio* **5**, e00966–14 (2014).
- 607 33. Miethke, M. & Marahiel, M. A. Siderophore-based iron acquisition and pathogen  
608 control. *Microbiol Mol Biol Rev* **71**, 413–51 (2007).
- 609 34. Mitchell, J. G. The energetics and scaling of search strategies in bacteria. *Am*  
610 *Nat* **160**, 727–40 (2002).
- 611 35. Nadell, C. D., Foster, K. R. & Xavier, J. B. Emergence of spatial structure in  
612 cell groups and the evolution of cooperation. *PLoS Comput Biol* **6**, e1000716  
613 (2010).
- 614 36. Sandy, M. & Butler, A. Microbial iron acquisition: marine and terrestrial sider-  
615 ophores. *Chem Rev* **109**, 4580–95 (2009).

- 616 37. Scholz, R. L. & Greenberg, E. P. Sociality in *Escherichia coli*: Enterochelin Is a  
617 Private Good at Low Cell Density and Can Be Shared at High Cell Density. *J*  
618 *Bacteriol* **197**, 2122–8 (2015).
- 619 38. Schwertmann, U., Friedl, J. & Stanjek, H. From Fe(III) Ions to Ferrihydrite and  
620 then to Hematite. *J Colloid Interface Sci* **209**, 215–223. ISSN: 0021-9797 (1999).
- 621 39. Stocker, R. & Seymour, J. R. Ecology and physics of bacterial chemotaxis in the  
622 ocean. *Microbiol Mol Biol Rev* **76**, 792–812 (2012).
- 623 40. Taylor, J. R. & Stocker, R. Trade-offs of chemotactic foraging in turbulent water.  
624 *Science* **338**, 675–9 (2012).
- 625 41. Velicer, G. J. Social strife in the microbial world. *Trends Microbiol* **11**, 330–7  
626 (2003).
- 627 42. Vetter, Y., Deming, J., Jumars, P. & Krieger-Brockett, B. A Predictive Model of  
628 Bacterial Foraging by Means of Freely Released Extracellular Enzymes. *Microb*  
629 *Ecol* **36**, 75–92 (1998).
- 630 43. Völker, C. & Wolf-Gladrow, D. A. Physical limits on iron uptake mediated by  
631 siderophores or surface reductases. *Marine Chemistry* **65**, 227–244 (1999).
- 632 44. Von der Heyden, B. P., Roychoudhury, A. N., Mtshali, T. N., Tyliczszak, T.  
633 & Myneni, S. C. B. Chemically and Geographically Distinct Solid-Phase Iron  
634 Pools in the Southern Ocean. *Science* **338**, 1199–1201 (2012).
- 635 45. Vraspir, J. M. & Butler, A. Chemistry of marine ligands and siderophores. *Ann*  
636 *Rev Mar Sci* **1**, 43–63 (2009).
- 637 46. Wandersman, C. & Delepelaire, P. Bacterial iron sources: from siderophores to  
638 hemophores. *Annu Rev Microbiol* **58**, 611–47 (2004).
- 639 47. West, S. A. & Buckling, A. Cooperation, virulence and siderophore production  
640 in bacterial parasites. *Proc Biol Sci* **270**, 37–44 (2003).
- 641 48. Wu, J, Boyle, E, Sunda, W & Wen, L. S. Soluble and colloidal iron in the  
642 oligotrophic North Atlantic and North Pacific. *Science* **293**, 847–9 (2001).

643 Benefits of siderophore release lie in medi-  
644 ating diffusion limitation at low iron solu-  
645 bility:  
646 Supplementary Text

647 Gabriel E. Leventhal<sup>1,2</sup>, Martin Ackermann<sup>3,4</sup>, and Konstanze T. Schiessl<sup>3,4,5</sup>

648 <sup>1</sup>Institute of Integrative Biology, Swiss Federal Institute of Technology Zurich (ETH  
649 Zürich), Zurich, Switzerland

650 <sup>2</sup>Department of Civil and Environmental Engineering, Massachusetts Institute of Technol-  
651 ogy (MIT), Cambridge, MA, U.S.A.

652 <sup>3</sup>Institute of Biogeochemistry and Pollutant Dynamics, Swiss Federal Institute of Tech-  
653 nology Zurich (ETH Zürich), Zurich, Switzerland

654 <sup>4</sup>Department of Environmental Microbiology, Swiss Federal Institute of Aquatic Science  
655 and Technology (Eawag), Dübendorf, Switzerland

656 <sup>5</sup>Department of Biological Sciences, Columbia University, 1212 Amsterdam Avenue, New  
657 York, NY 10027, USA

658

## 659 A Variational formulation of the reaction-diffusion 660 problem

661 We numerically integrate the reaction-diffusion equations for the two cell case using  
662 FEniCS 1.6.0 (Alnæs *et al.*, 2015). In order to solve the time dependent problem, we  
663 use a finite differences approximation for the time dimension, and solve the variational  
664 formulation at each time step using the finite element method. For completeness, we  
665 here briefly reiterate the formulation of the time-dependent variational formulation.

666 **Variational formulation for the stationary problem.** The finite element method  
667 uses the weak variational formulation of the system of partial differential equations of  
668 the reaction-diffusion system. Briefly, a PDE for the function  $u(r, z)$  with cylindrical  
669 symmetry defined on  $(r, z) \in \Omega$  of the form,

$$-\frac{\partial}{\partial r} \left( rD \frac{\partial u}{\partial r} \right) + rD \frac{\partial^2 u}{\partial z^2} = rf(u),$$

670 is multiplied by a test function  $v(r, z)$  and integrated over  $\Omega$ ,

$$-\int_{\Omega} \nabla \cdot (rD \nabla u) v \, dx = \int_{\Omega} rf v \, dx.$$

671 The left hand side can be integrated by parts, and by forcing  $v = 0$  on the bound-  
672 aries where  $u$  is known. The cylindrically symmetrical problem stated in the weak  
673 variational formalism is thus,

$$\int_{\Omega} rD \nabla u \cdot \nabla v \, dx = \int_{\Omega} rf v \, dx.$$

674 Equivalently, for a spherically symmetric problem,

$$\int_{\Omega} r^2 D \nabla u \cdot \nabla v \, dx = \int_{\Omega} r^2 f v \, dx.$$

675 **Variational formulation time-dependent problem.** Here we use the standard  
676 finite difference discretization of the time derivative, such that  $\partial_t u \approx (u^{(k)} - u^{(k-1)})/\Delta t$ .  
677 The time dependent PDE equation becomes,

$$\frac{\partial u}{\partial t} \approx \frac{u^{(k)} - u^{(k-1)}}{\Delta t} = rf^{(k)} + \nabla \cdot (rD \nabla u^{(k)})$$



678 We then iterate along the finite differences by successively solving the following equa-  
679 tion using finite elements for a known  $u^{(k-1)}$ ,

$$\int_{\Omega} \{u^{(k)}v^{(k)} + \Delta t r D \nabla u^{(k)} \cdot \nabla v^{(k)}\} dx = \int_{\Omega} \{u^{(k-1)} + \Delta t r f^{(k)}v^{(k)} dx\} dx.$$

## 680 **B The spatio-temporal effects of siderophore secre-** 681 **tion on the distribution of iron in space**

682 Strong temporal dynamics become visible when quantifying the radial distributions  
683 of iron, siderophores and bound iron over time for aggregates of different sizes in  
684 the presence of secreted siderophores (Fig. S1). As soon as the cell begins to secrete  
685 siderophores, the iron close to the cell is quickly bound and depleted, and the iron-  
686 siderophore complexes are subsequently taken up by the cell with a high probability.  
687 If iron is soluble ( $k = 1$ ) then the diffusion speed is maximal and the bound free iron  
688 close to the cell is quickly replenished by new iron diffusing towards the cell from a  
689 distance. Therefore, the iron concentration close to the cell is roughly the same as  
690 the background level (Fig. S1a). New siderophores thus quickly encounter free iron  
691 to bind, which can then be taken up by the cell, resulting in a high concentration of  
692 bound iron-siderophore complexes close to the cell (see Methods, Eq. 15). The cell is  
693 thus transport- and not diffusion-limited. In this fast diffusion limit the background  
694 concentration of iron is almost constant, and the iron uptake rate is primarily deter-  
695 mined by the secretion rate of siderophores (see Methods and Völker & Wolf-Gladrow,  
696 1999).

697 At higher aggregation levels, though, fresh iron diffuses towards the cell more  
698 slowly, eventually resulting in a total depletion of free iron close to the cell (Fig. S1b,c).  
699 At the same time, free siderophores diffuse away from the cell and a ‘hot-spot’ for  
700 the formation of bound siderophores builds up at a certain distance from the cell,  
701 resulting in a traveling peak in the distribution of bound iron over time (Fig. S1b,c).  
702 As bound iron is either taken up by the cell or diffuses away, this peak eventually  
703 flattens out over time and moves away from the cell to a final distance  $R^*$  (dashed  
704 lines in Fig. S1; see Methods, Eq. 12). The distribution of bound iron thus approaches  
705 a lower equilibrium level. Within this boundary,  $r < R^*$ , the concentration of free  
706 iron is zero, i.e. close to the cell all nonchelated iron is completely depleted. At  
707 the boundary,  $r = R^*$ , the influx of free siderophores is perfectly balanced by the

708 influx of free iron. Thus, beyond the boundary,  $r > R^*$ , the concentration of free  
709 siderophores is zero. Hence, siderophore-iron complexes are only produced on the  
710 boundary  $r = R^*$ . This defines a ‘sphere of influence’,  $R^*$ , which depends on the  
711 degree of iron aggregation. For large  $k$ , it can reach up to 1 mm, i.e. secreting cells  
712 create a large region where no unchelated, free iron is available. The physicochemical  
713 properties of iron thus play an important role in determining the degree to which  
714 bacteria influence and modify their environment when secreting siderophores. In such  
715 regions where only siderophore-bound iron is present, other bacteria that are not able  
716 to access chelated iron could have competitive disadvantages (Fgaier & Eberl, 2010).

## 717 C Comparing the effects of bacterial motility and 718 siderophore secretion on iron uptake

719 **Increased diffusion.** In the first model of contact-dependent iron uptake, the cell  
720 was assumed to be nonmotile. Alternatively to secreting siderophores, the cell could  
721 also increase its own diffusion coefficient,  $D_B$ , and be motile. Potentially, if the cell  
722 moves, the chance of iron uptake upon direct encounter could be enhanced. We tested  
723 this by including a term for cell motility and measuring iron uptake in a cell relying  
724 on direct physical contact with iron sources. The direct uptake rate is approximately  
725 constant after a short initial phase and is mostly limited by the diffusion coefficient  
726 of the iron aggregates,  $D_k$ , rather than the diffusion coefficient of the cell,  $D_B$ ,

$$J \approx (D_B + D_k)\rho_0/R_B.$$

727 Figure S3 shows the relative increase in the diffusion coefficient the cell would need  
728 to achieve in order to equal the uptake rate of the secreter. Already for moderate  
729 aggregation levels of  $> 10^5$ , the cell would need to increase its diffusion coefficient  
730 over 100-fold for secretion rates of 1 amol/s upwards. If we use the expression for  
731 diffusion due to motility (Dusenbery, 2009),

$$D_m = \frac{v^2}{6D_R} = \frac{4r_B^2 u^2}{6D_R},$$

732 where  $v$  is the velocity and  $u = v/2r_B$  the relative velocity of a sphere with radius  
733  $r_B$ , and  $D_R$  is the rotational diffusion coefficient,

$$D_R = \frac{k_B T}{8\pi h r_B^3},$$

734 then the relative diffusion coefficient is

$$\frac{D_m}{D_B} = 32 \left( \frac{\pi h}{k_B T} \right)^2 r_B^6 u^2.$$

735 The required relative swimming speed required to gain an 100- or 500-fold increase in  
736 the diffusion coefficient would then be  $u = 2.27$  lengths/s and  $5.07$  lengths/s, respec-  
737 tively, or a speed of around  $5 - 10 \mu\text{m/s}$ .

## 738 D Iron uptake competition

739 Once secreted siderophores encounter and bind iron, the chelates must successfully  
740 return to cell via diffusion. For a single cell, this process can be modelled by diffusion  
741 around a spherical sink. We generally know the probability that a chelate arrives at  
742 the cell, i.e. the hitting probability of a small diffusing particle starting at a distance  $r$   
743 on a sphere with radius  $R$ . In one or two dimensions,  $p_1 = 1$ , but in three dimensions  
744  $p_1 \approx R/r$ . We are interested in the probability that a chelate is ‘stolen’ from a cell  
745 A by a cell B, i.e. the fraction of trajectories from the initial position O to A that  
746 pass through B. We can decompose the probability that the chelate arrives at A into  
747 direct paths, that do not pass through B, and indirect paths, that pass through B,

$$\Pr(0 \rightarrow A) = \Pr(0 \rightarrow A \setminus B) + \Pr(0 \rightarrow B \setminus A) \Pr(B \rightarrow A).$$

748 Let  $p_1 = R/r \approx \Pr(0 \rightarrow A)$  be the hitting probability for a particle starting at a large  
749 distance  $r$  and  $b = \Pr(0 \rightarrow A \setminus B)$  be the probability of arriving at A by avoiding a cell  
750 B at a distance  $d$  (which is approximately the same as arriving at B by avoiding A  
751 for  $r \gg d$ ). Let  $c = R/d \approx \Pr(B \rightarrow A)$  be the hitting probability of A when starting  
752 at B (or of B when starting at A). Thus,  $p_1 = b(1 + c)$ , and hence  $b = p_1/(1 + c)$ . The  
753 fraction of chelates that would arrive at A by first passing through B is thus,

$$f_2 = \frac{\Pr(0 \rightarrow B \setminus A) \Pr(B \rightarrow A)}{\Pr(0 \rightarrow A)} = \frac{c}{1 + c}. \quad (16)$$

754 In three dimensions, for two cells at a distance  $d$ ,  $c \approx R_B/d$ . Thus, for an immediately  
755 neighbouring cell,  $d \rightarrow R_B$ ,  $c \rightarrow 1$  and  $f_2 = 1/2$ , such that half of the chelates are  
756 stolen by B. However for cells that are sufficiently far apart,  $d \gg R_B$  and  $c \ll 1$ , such  
757 that  $f_2 \approx c$  and the cell *de facto* no longer feels the competition of the other cell. In  
758 one or two dimensions, however,  $c = 1$  for all distances and hence the competition is  
759 always  $1/2$ .

## 760 Supplementary Figures

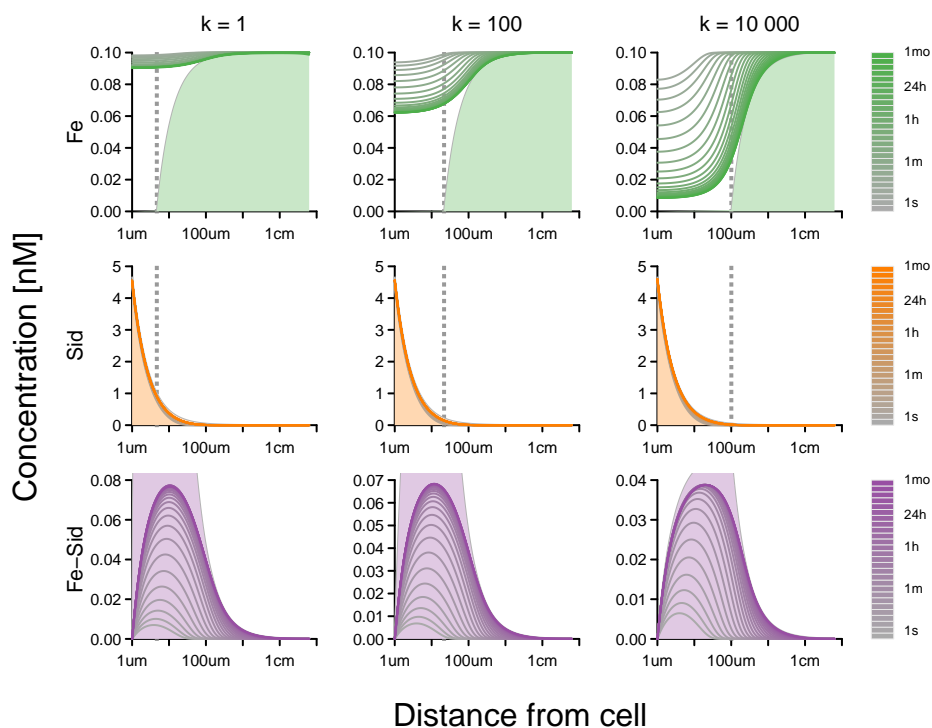

**Figure S1: Radial distribution of free iron, free siderophores and iron-siderophore complexes over time.** The figure columns correspond to different values of iron aggregation, with each aggregate containing  $k$  iron ions. The intensity of the color indicates the time. The vertical dashed grey lines show the large- $k$  approximation of the peak iron-siderophore distribution  $R^*$  and the shaded areas show the large- $k$  approximation of the equilibrium distributions. At high  $k$ , the free iron close to the cell is bound by secreted siderophores and depleted. For very large  $k$ , the concentration at the cell surface drops to zero. The distribution of free siderophores quickly approach their equilibrium distribution, which is close to the distribution of siderophores in absence of iron. As the iron within the boundary  $R^*$  is slowly depleted, the concentration of iron-siderophore complexes first increases to high levels, before flattening out to its equilibrium distribution, where most new iron-siderophore complexes are produced at a distance  $R^*$ . This equilibrium distribution, however, is only reached after a considerable time ( $> 1$  month for  $k = 10^6$ ). See also Fig. S2 for  $k = 10^2, 10^6, 10^{10}$ .

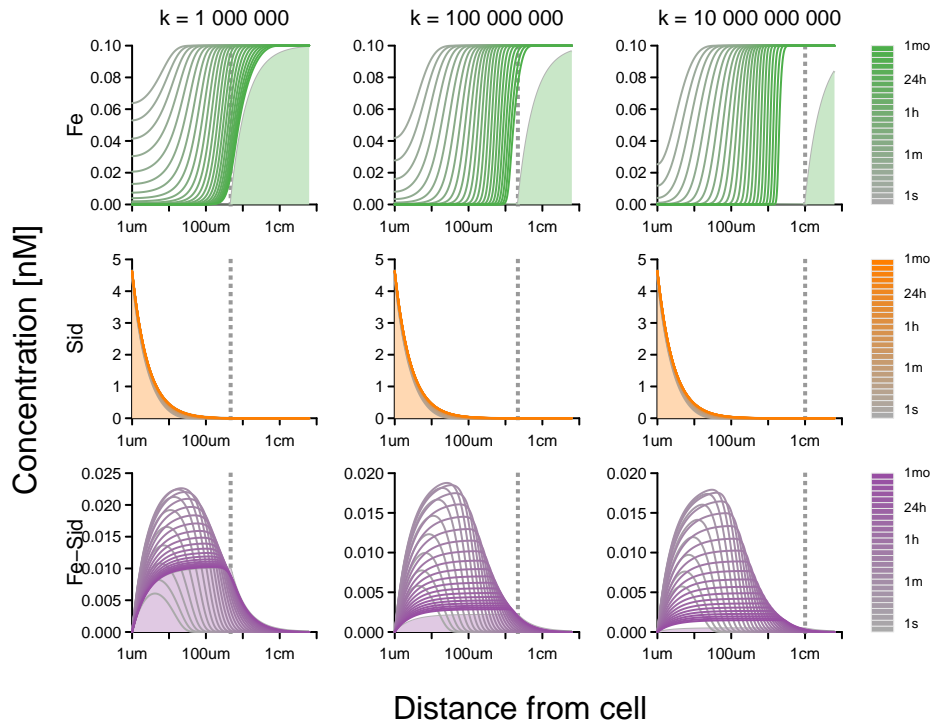

Figure S2: Radial distribution of free iron, free siderophores and iron-siderophore complexes over time (continued).

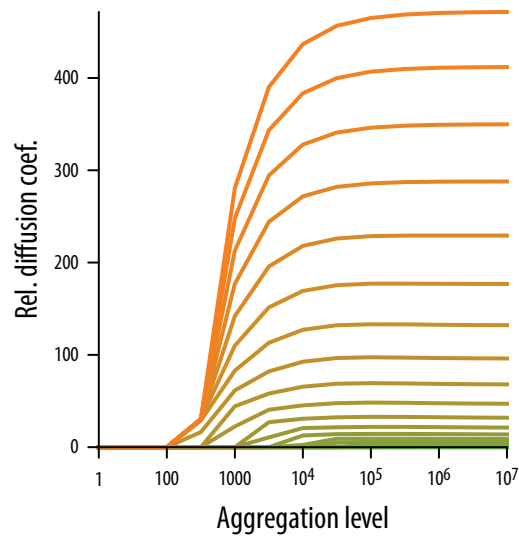

Figure S3: Relative diffusion coefficient required by a cell to achieve an equivalent increase in iron uptake as siderophore secretion.

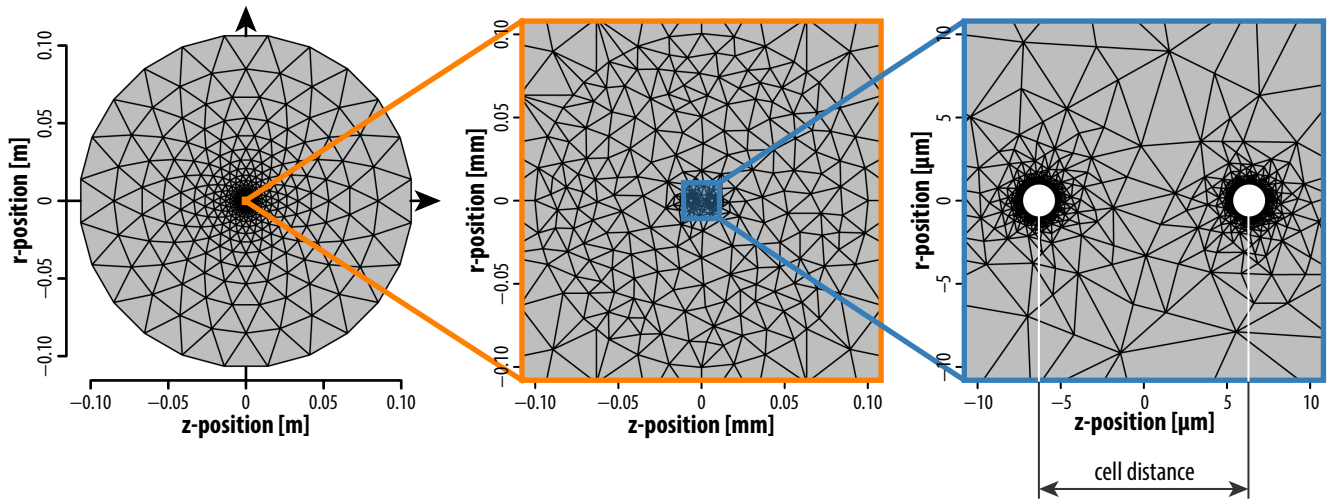

**Figure S4: Example mesh used in the 2D numerical integration scheme.** The cylindrical symmetry of two cells can be exploited to only solve the reaction-diffusion equations in two dimensions. The large length scale differences between cell spacing and siderophore diffusion require the use of an expanding mesh. A local for  $r < 0.1$  mm was mesh was created and refined using the mesh generation routines in FEniCS (Alnæs *et al.*, 2015). For  $r > 0.1$  mm a regular circular expanding mesh was added to the local mesh.

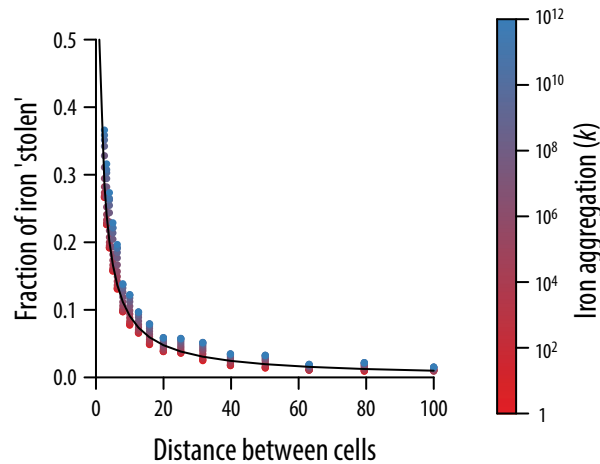

**Figure S5: The fraction of iron that is stolen by a neighboring cell depends on the distance between cells.** The approximation for the fraction of iron that is stolen by a neighbor at a distance  $d$  (black line) is in excellent agreement with the numerical solutions at different aggregation levels (colored points). The color scale is the same as in Fig. 3.
